# Supplementary material for: Impact of ambient gases on the mechanism of [Cs8Nb6O19]-promoted nerve-agent decomposition
Source: Royal Society of Chemistry journal article supplement (doi:10.1039/c7sc04997h), 2018-01-01
Supplement: c7sc04997h1.pdf [file c7sc04997h1.pdf]

## Supporting Information

### Impact of Ambient Gases on the Mechanism of the [Cs<sub>8</sub>Nb<sub>6</sub>O<sub>19</sub>]-Promoted Nerve-Agent Decomposition

Alexey L. Kaledin,<sup>a)</sup> Darren M. Driscoll,<sup>b)</sup> Diego Troya,<sup>b)</sup> Daniel Collins-Wildman,<sup>c)</sup>  
Craig L. Hill,<sup>\*,c)</sup> John R. Morris,<sup>\*,b)</sup> and Djamaladdin G. Musaev,<sup>\*,a,b)</sup>

---

a) Cherry L. Emerson Center for Scientific Computation, Emory University, 1515 Dickey Drive, Atlanta, Georgia 30322, USA

b) Department of Chemistry, Virginia Tech, Blacksburg, Virginia, 24061, USA

c) Department of Chemistry, Emory University, 1515 Dickey Drive, Atlanta, Georgia 30322, USA

\* E-mail: [dmusaev@emory.edu](mailto:dmusaev@emory.edu) (DGM), [jmorris@vt.edu](mailto:jmorris@vt.edu) (JRM) and [chill@emory.edu](mailto:chill@emory.edu) (CLH)

---

#### Table of Contents

1. **Figure S1.** The calculated transition states, intermediates and products of the GB hydrolysis and their important geometry parameters (in Å) for X = SO<sub>2</sub>.....S2
2. **Figure S2.** The calculated transition states, intermediates and products of the pentacoordinated P5-F<sub>2</sub>SO<sub>2</sub> dissociation (i.e. reactions: P5-F<sub>2</sub>SO<sub>2</sub> → Cs<sub>8</sub>Nb<sub>6</sub>O<sub>19</sub>/SO<sub>2</sub>-(MPFA)-(i-POH) → Cs<sub>8</sub>Nb<sub>6</sub>O<sub>19</sub>/SO<sub>2</sub> + MPFAH + (i-POH) and P5-F<sub>2</sub>X → Cs<sub>8</sub>Nb<sub>6</sub>O<sub>19</sub>/SO<sub>2</sub>-(MPA)-HF → Cs<sub>8</sub>Nb<sub>6</sub>O<sub>19</sub>/SO<sub>2</sub> + MPAH + HF) with their important geometry parameters (in Å)..... S3
3. **Figure S3.** The calculated adsorption energies (in kcal/mol) of NO<sub>2</sub> radicals to Cs<sub>8</sub>Nb<sub>6</sub>O<sub>19</sub>.....S4

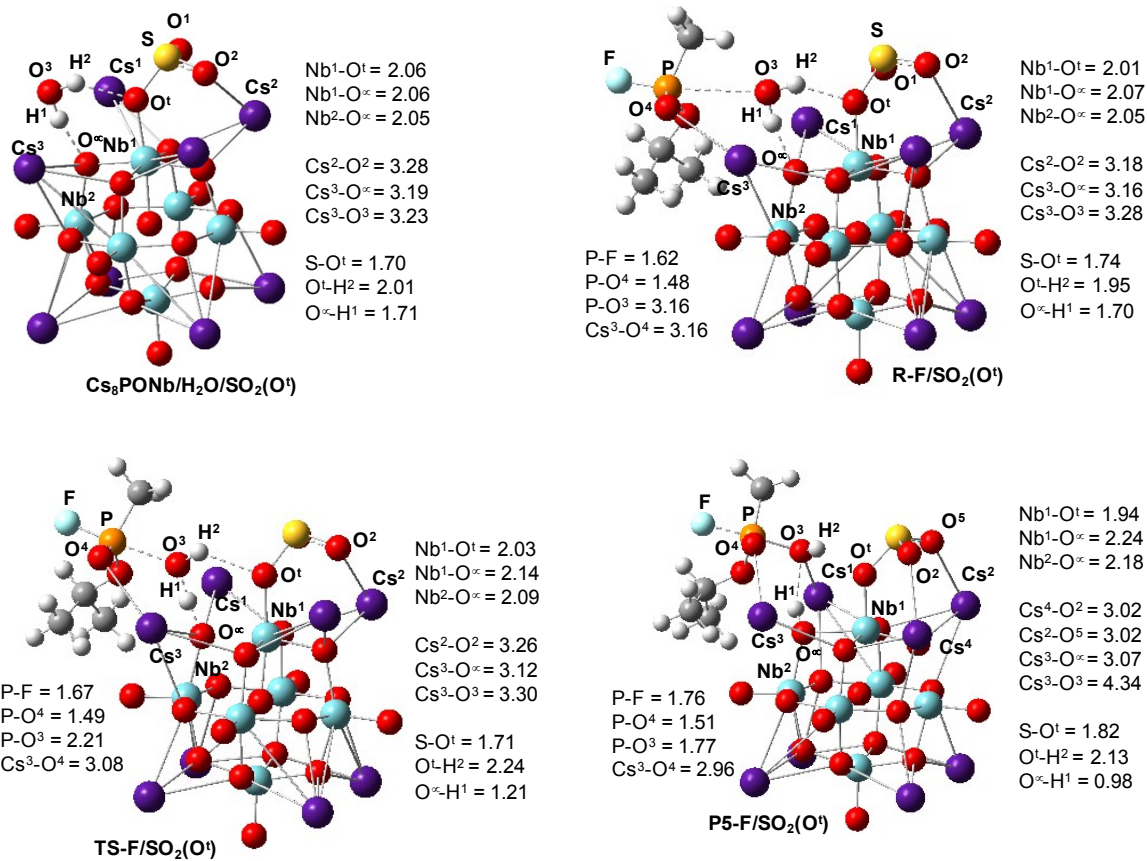

**Figure S1.** Calculated pre-reaction complexes, transition state and product of the GB hydrolysis by Cs<sub>8</sub>Nb<sub>6</sub>O<sub>19</sub>/SO<sub>2</sub> (i.e. reaction Cs<sub>8</sub>Nb<sub>6</sub>O<sub>19</sub>/SO<sub>2</sub> + H<sub>2</sub>O + GB → R-F\_SO<sub>2</sub> → TS-F\_SO<sub>2</sub> → P5-F\_SO<sub>2</sub>) and their important geometry parameters (in Å).

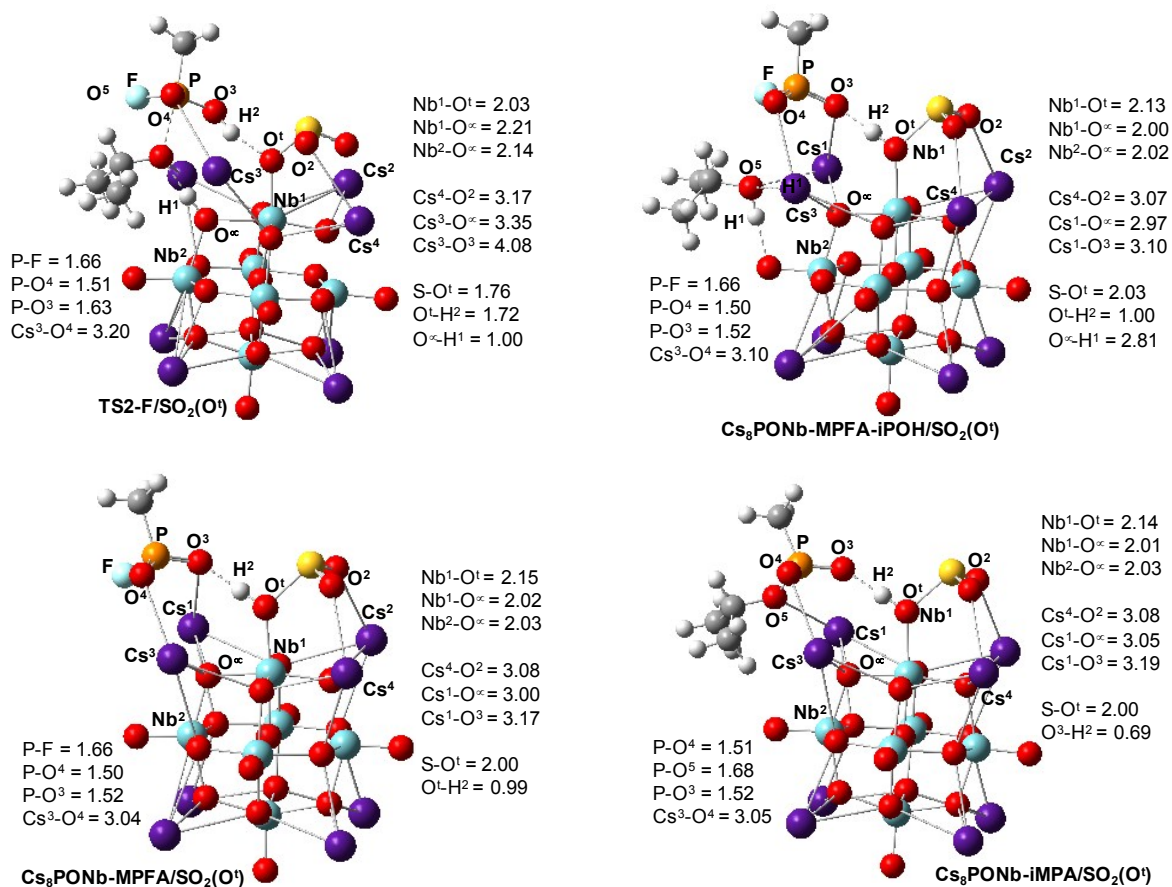

**Figure S2.** The calculated transition states, intermediates and products of the pentacoordinated P5-F<sub>2</sub>SO<sub>2</sub> dissociation (i.e. reactions: P5-F<sub>2</sub>SO<sub>2</sub> → Cs<sub>8</sub>Nb<sub>6</sub>O<sub>19</sub>/SO<sub>2</sub>-(MPFA)-(i-POH) → Cs<sub>8</sub>Nb<sub>6</sub>O<sub>19</sub>/SO<sub>2</sub> + MPFAH + (i-POH) and P5-F<sub>2</sub>X → Cs<sub>8</sub>Nb<sub>6</sub>O<sub>19</sub>/SO<sub>2</sub>-(MPA)-HF → Cs<sub>8</sub>Nb<sub>6</sub>O<sub>19</sub>/SO<sub>2</sub> + MPAH + HF) with their important geometry parameters (in Å).

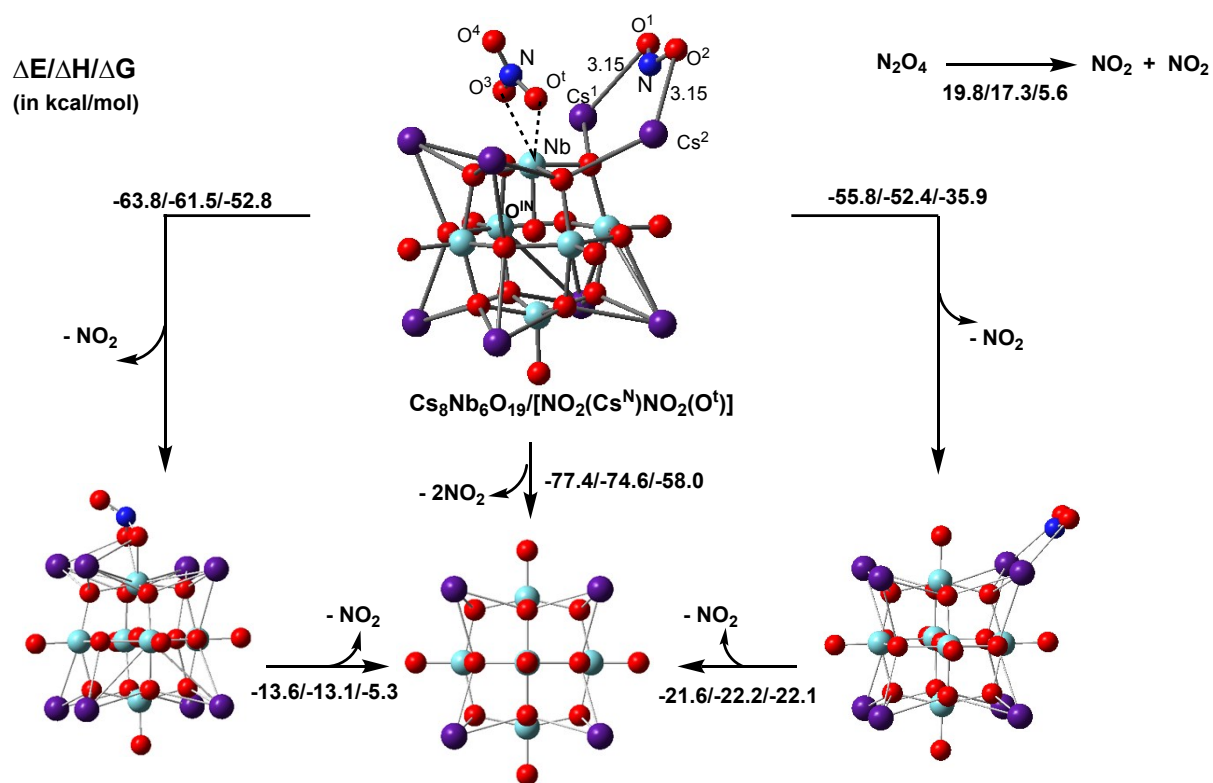

**Figure S3.** The calculated adsorption energies (in kcal/mol) of NO<sub>2</sub> radicals to Cs<sub>8</sub>Nb<sub>6</sub>O<sub>19</sub>
